# Supplementary material for: miR-100-3p inhibits the adipogenic differentiation of hMSCs by targeting PIK3R1 via the PI3K/AKT signaling pathway
Source: publisher site journal article supplement (doi:10.18632/aging.104074), 2020-11-20
Supplement: Supplementary file [file aging-v12i24-104074-supplementary-material-SD1.pdf]

## SUPPLEMENTARY TABLES

**Supplementary Table 1. Primers used in this study for  $\beta$ -actin, PPAR $\gamma$ , FABP4, and PIK3R1.**

| <b>Gene symbol</b> | <b>Forward primer</b>          | <b>Reverse primer</b>           |
|--------------------|--------------------------------|---------------------------------|
| PPAR $\gamma$      | 5'-GGATGTCTCATAATGCCATCAG-3'   | 5'-GCCCTCGCCTTTGCTTTG-3'        |
| FABP4              | 5'-GGATGATAAACTGGTGGTGAATG-3'  | 5'-CAGAATGTTGTAGAGTTCAATGCGA-3' |
| PIK3R1             | 5'-GAAGCGAGATGGCACTTTTC-3      | 5'-AGCCATAGCCAGTTGCTGTT-3       |
| $\beta$ -actin     | 5'-GCGAGAAGATGACCCAGATCATGT-3' | 5'-TACCCCTCGTAGATGGGCACA-3'     |
